# Supplementary material for: Probing the nature of the Co(iii) ion in cobalamins: deactivation of the metal towards ligand substitution in 10-nitrosoaquacobalamin, and the kinetics of the ligand substitution reactions of iodocobalamin
Source: Royal Society of Chemistry journal article supplement (doi:10.1039/b202158g), 2002-01-01
Supplement: b202158g.pdf [file b202158g.pdf]

**Probing the nature of the Co(III) ion in the cobalamins:  
Kinetics of the ligand substitution reactions of  
iodocobalamin, and the deactivation of the metal towards  
ligand substitution in aqua-10-nitrosocobalamin**

Helder M. Marques,<sup>a\*</sup> Leanne Knapton,<sup>a</sup> Xiang Zou<sup>b</sup> and Kenneth L. Brown<sup>b</sup>

<sup>a</sup>*Molecular Sciences Institute, School of Chemistry, University of the Witwatersrand, PO Wits,  
Johannesburg, 2050 South Africa;* <sup>b</sup>*Department of Chemistry and Biochemistry, Ohio  
University, Athens, Ohio 45701, USA*

**Electronic Supplementary Information:  
NMR data for 10-NO-H<sub>2</sub>OCbl<sup>+</sup> and primary kinetic data for the  
ligand substitution reactions of ICbl**

**Table S1.**  $^1\text{H}$  and  $^{13}\text{C}$  NMR Assignments for 10-NO-H<sub>2</sub>OCbl<sup>+</sup> <sup>a</sup>

| Group | $\delta_{^{13}\text{C}}$ , ppm | $\delta_{^1\text{H}}$ , ppm | Group | $\delta_{^{13}\text{C}}$ , ppm | $\delta_{^1\text{H}}$ , ppm |
|-------|--------------------------------|-----------------------------|-------|--------------------------------|-----------------------------|
| C35   | 17.87                          | 2.58                        | R1    | 89.93                          | 6.32 <sup>h</sup>           |
| C53   | 18.14                          | 2.66                        | C15   | 109.65                         |                             |
| C54   | 18.32                          | 1.32                        | C5    | 113.06                         |                             |
| C25   | 19.51                          | 1.42                        | B7    | 114.31                         | 7.26                        |
| C47   | 20.74                          | 1.45                        | B4    | 118.70                         | 6.40                        |
| C36   | 21.30                          | 1.94                        | B8    | 132.21                         |                             |
| Pr3   | 21.58 <sup>b</sup>             | 1.27 <sup>c</sup>           | C10   | 132.77                         |                             |
| B11   | 21.87                          | 2.26                        | B5    | 136.10                         |                             |
| C20   | 22.41                          | 0.40                        | B6    | 138.22                         |                             |
| B10   | 22.51                          | 2.27                        | B9    | 139.10                         |                             |
| C30   | 28.68                          | 2.01, 2.14                  | B2    | 143.80                         | 6.80                        |
| C41   | 29.56                          | 1.08, 1.89                  | C6    | 165.68                         |                             |
| C48   | 31.12                          | 1.95, 2.10                  | C14   | 166.41                         |                             |
| C46   | 32.20                          | 1.28                        | C11   | 170.88                         |                             |
| C60   | 33.90                          | 2.70, 2.77                  | C9    | 171.28                         |                             |
| C42   | 34.93                          | 1.09, 2.04                  | C38   | 177.08                         |                             |
| C55   | 35.05                          | 1.87, 2.70                  | C57   | 177.14                         |                             |
| C56   | 35.41                          | 2.10, 2.63                  | C61   | 178.14                         |                             |
| C49   | 37.10                          | 2.66                        | C27   | 178.51                         |                             |
| C31   | 37.47                          | 2.55, 2.62                  | C43   | 179.00                         |                             |
| C18   | 41.80                          | 2.87                        | C32   | 180.24                         |                             |
| C37   | 44.12                          | 2.12, 2.51                  | C50   | 180.30                         |                             |
| C26   | 44.90                          | 2.43, 2.63                  | C16   | 182.24                         |                             |
| Pr1   | 48.00 <sup>d</sup>             | 2.93, 3.63                  | C4    | 183.62                         |                             |

| Group | $\delta_{13\text{C}}$ , ppm | $\delta_{1\text{H}}$ , ppm | Group                   | $\delta_{13\text{C}}$ , ppm | $\delta_{1\text{H}}$ , ppm |
|-------|-----------------------------|----------------------------|-------------------------|-----------------------------|----------------------------|
| C2    | 50.01                       |                            | R7                      |                             | 5.59                       |
| C12   | 53.80                       |                            | <i>d</i> H <sub>A</sub> |                             | 6.33                       |
| C7    | 54.85                       |                            | <i>d</i> H <sub>S</sub> |                             | 6.67                       |
| C8    | 56.77                       | 3.65                       | <i>b</i> H <sub>S</sub> |                             | 6.89                       |
| C13   | 58.05                       | 3.43                       | <i>e</i> H <sub>S</sub> |                             | 6.98                       |
| C3    | 58.85                       | 4.43                       | <i>c</i> H <sub>S</sub> |                             | 6.98                       |
| C17   | 61.11                       |                            | <i>g</i> H <sub>S</sub> |                             | 7.07                       |
| R5    | 63.05                       | 3.75, 3.91                 | <i>a</i> H <sub>S</sub> |                             | 7.07                       |
| R2    | 71.29                       | 4.28                       | <i>c</i> H <sub>A</sub> |                             | 7.33                       |
| R3    | 75.33 <sup>e</sup>          | 4.74                       | <i>b</i> H <sub>A</sub> |                             | 7.62                       |
| Pr2   | 75.39 <sup>f</sup>          | 4.29                       | <i>e</i> H <sub>A</sub> |                             | 7.67                       |
| C19   | 76.25                       | 4.69                       | <i>a</i> H <sub>A</sub> |                             | 7.76                       |
| R4    | 84.77 <sup>g</sup>          | 4.06                       | <i>g</i> H <sub>A</sub> |                             | 7.91                       |
| C1    | 88.29                       |                            | <i>f</i> H              |                             | 8.17                       |

<sup>a</sup>In 90% H<sub>2</sub>O/10%D<sub>2</sub>O, 25 °C. Chemical shifts are relative to internal TSP. The *syn* and *anti* amide H's are designated *a*H<sub>S</sub>, *a*H<sub>A</sub>, *b*H<sub>S</sub>, *b*H<sub>A</sub>, etc., respectively, where *a*, *b*, etc., refer to the standard side chain lettering. <sup>b</sup> $^3J_{\text{PC}} = 1.5$  Hz. <sup>c</sup> $J_{\text{Pr2-Pr3}} = 6.$  Hz. <sup>d</sup> $^3J_{\text{PC}} = 4.7$  Hz. <sup>e</sup> $^2J_{\text{PC}} = 9.9$  Hz. <sup>f</sup> $^2J_{\text{PC}} = 3.8$  Hz. <sup>g</sup> $^3J_{\text{PC}} = 6.9$  Hz. <sup>h</sup> $^3J_{\text{R1,R2}} = 2.5$  Hz.

**Table S2.** Comparison of the  $^{13}\text{C}$  resonances of  $\text{H}_2\text{OCbl}^+$ , 10-Cl- $\text{H}_2\text{OCbl}^+$  and 10-NO- $\text{H}_2\text{OCbl}^+$ .

| Group | $\text{H}_2\text{OCbl}^+$ ,<br>ppm | 10-Cl-<br>$\text{H}_2\text{OCbl}^+$ , ppm | $\delta_1$ , ppm | 10-NO-<br>$\text{H}_2\text{OCbl}^+$ , ppm | $\delta_2$ , ppm |
|-------|------------------------------------|-------------------------------------------|------------------|-------------------------------------------|------------------|
| C35   | 18.11                              | 18.83                                     | 0.72             | 17.87                                     | -0.24            |
| C53   | 17.96                              | 18.13                                     | 0.17             | 18.14                                     | 0.18             |
| C54   | 19.26                              | 19.03                                     | -0.23            | 18.32                                     | -0.94            |
| C25   | 20.28                              | 20.30                                     | 0.02             | 19.51                                     | -0.77            |
| C36   | 23.81                              | 23.86                                     | 0.05             | 21.30                                     | -2.51            |
| Pr3   | 21.62                              | 21.72                                     | 0.10             | 21.58                                     | -0.04            |
| B11   | 21.81                              | 21.72                                     | -0.09            | 21.87                                     | 0.06             |
| B10   | 22.52                              | 22.54                                     | 0.02             | 22.51                                     | -0.01            |
| C20   | 22.41                              | 22.23                                     | -0.18            | 22.41                                     | 0.00             |
| C47   | 22.18                              | 24.63                                     | 2.45             | 20.74                                     | -1.44            |
| C41   | 29.02                              | 29.85                                     | 0.83             | 29.56                                     | 0.54             |
| C30   | 29.02                              | 29.09                                     | 0.07             | 28.68                                     | -0.34            |
| C48   | 30.64                              | 31.25                                     | 0.61             | 31.12                                     | 0.48             |
| C46   | 34.84                              | 32.13                                     | -2.71            | 32.20                                     | -2.64            |
| C42   | 33.99                              | 33.99                                     | 0.00             | 34.93                                     | 0.94             |
| C55   | 35.23                              | 35.14                                     | -0.09            | 35.05                                     | -0.18            |
| C56   | 35.57                              | 35.37                                     | -0.20            | 35.41                                     | -0.16            |
| C60   | 33.90                              | 33.99                                     | 0.09             | 33.90                                     | 0.00             |
| C49   | 37.21                              | 37.52                                     | 0.31             | 37.10                                     | -0.11            |
| C31   | 37.50                              | 38.18                                     | 0.68             | 37.47                                     | -0.03            |
| C18   | 42.21                              | 42.27                                     | 0.06             | 41.80                                     | -0.41            |
| C37   | 48.21                              | 48.15                                     | -0.06            | 44.12                                     | -4.09            |
| C26   | 45.95                              | 45.88                                     | -0.07            | 44.90                                     | -1.05            |
| Pr1   | 47.95                              | 47.96                                     | 0.01             | 48.00                                     | 0.05             |
| C2    | 50.25                              | 49.96                                     | -0.29            | 50.01                                     | -0.24            |
| C12   | 50.90                              | 53.36                                     | 2.46             | 53.80                                     | 2.90             |
| C7    | 53.59                              | 54.20                                     | 0.61             | 54.85                                     | 1.26             |
| C13   | 56.42                              | 57.92                                     | 1.50             | 58.05                                     | 1.63             |
| C8    | 60.02                              | 59.98                                     | -0.04            | 56.77                                     | -3.25            |
| C3    | 59.68                              | 59.41                                     | -0.27            | 58.85                                     | -0.83            |
| C17   | 61.75                              | 61.39                                     | -0.36            | 61.11                                     | -0.64            |
| R5    | 62.85                              | 62.92                                     | 0.07             | 63.05                                     | 0.20             |
| R2    | 71.20                              | 71.32                                     | 0.12             | 71.29                                     | 0.09             |
| Pr2   | 75.39                              | 75.51                                     | 0.12             | 75.39                                     | 0.00             |
| R3    | 75.50                              | 75.56                                     | 0.06             | 75.33                                     | -0.17            |
| C19   | 77.73                              | 77.33                                     | -0.40            | 76.25                                     | -1.48            |
| R4    | 84.84                              | 84.80                                     | -0.04            | 84.77                                     | -0.07            |

| <b>Group</b> | <b>H<sub>2</sub>OCbl<sup>+</sup>,<br/>ppm</b> | <b>10-Cl-<br/>H<sub>2</sub>OCbl<sup>+</sup>, ppm</b> | <b>δ<sub>1</sub>, ppm</b> | <b>10-NO-<br/>H<sub>2</sub>OCbl<sup>+</sup>, ppm</b> | <b>δ<sub>2</sub>, ppm</b> |
|--------------|-----------------------------------------------|------------------------------------------------------|---------------------------|------------------------------------------------------|---------------------------|
| C1           | 87.67                                         | 87.58                                                | -0.09                     | 88.29                                                | 0.62                      |
| R1           | 90.02                                         | 89.91                                                | -0.11                     | 89.93                                                | -0.09                     |
| C10          | 97.58                                         | 106.84                                               | 9.26                      | 132.77                                               | 35.19                     |
| C15          | 106.85                                        | 107.75                                               | 0.90                      | 109.65                                               | 2.80                      |
| C5           | 110.63                                        | 112.15                                               | 1.52                      | 113.06                                               | 2.43                      |
| B7           | 114.50                                        | 114.42                                               | -0.08                     | 114.31                                               | -0.19                     |
| B4           | 118.15                                        | 118.35                                               | 0.20                      | 118.70                                               | 0.55                      |
| B8           | 131.82                                        | 131.94                                               | 0.12                      | 132.21                                               | 0.39                      |
| B5           | 136.41                                        | 136.26                                               | -0.15                     | 136.10                                               | -0.31                     |
| B6           | 138.52                                        | 138.44                                               | -0.08                     | 138.22                                               | -0.30                     |
| B9           | 138.70                                        | 138.76                                               | 0.06                      | 139.10                                               | 0.40                      |
| B2           | 144.07                                        | 143.95                                               | -0.12                     | 143.80                                               | -0.27                     |
| C6           | 166.75                                        | 166.25                                               | -0.50                     | 165.68                                               | -1.07                     |
| C14          | 168.53                                        | 168.18                                               | -0.35                     | 166.41                                               | -2.12                     |
| C9           | 177.24                                        | 176.74                                               | -0.50                     | 171.28                                               | -5.96                     |
| C11          | 181.49                                        | 177.75                                               | -3.74                     | 170.88                                               | -10.61                    |
| C38          | 178.12                                        | 177.27                                               | -0.85                     | 177.08                                               | -1.04                     |
| C57          | 177.29                                        | 177.08                                               | -0.21                     | 177.14                                               | -0.15                     |
| C16          | 183.85                                        | 182.51                                               | -1.34                     | 182.24                                               | -1.61                     |
| C4           | 183.99                                        | 183.27                                               | -0.72                     | 183.62                                               | -0.37                     |
| C61          | 178.12                                        | 178.18                                               | 0.06                      | 178.14                                               | 0.02                      |
| C27          | 178.48                                        | 178.51                                               | 0.03                      | 178.51                                               | 0.03                      |
| C43          | 179.44                                        | 179.55                                               | 0.11                      | 179.00                                               | -0.44                     |
| C32          | 180.24                                        | 180.27                                               | 0.03                      | 180.24                                               | 0.00                      |
| C50          | 180.60                                        | 180.53                                               | -0.07                     | 180.30                                               | -0.30                     |

**Table S3.** Comparison of the Side Chain Amide N-H Chemical Shifts of 10-NO-H<sub>2</sub>OCbl<sup>+</sup> to Cbl's<sup>a</sup>

| N-H                     | $\delta$ <sup>1</sup> H, ppm |                           |                                               |
|-------------------------|------------------------------|---------------------------|-----------------------------------------------|
|                         | Average <sup>b</sup>         | H <sub>2</sub> O-10-NOcbl | $\Delta$ $\delta$ <sup>1</sup> H <sup>c</sup> |
| <i>a</i> H <sub>A</sub> | 7.81 ± 0.08                  | 7.76                      | 0.05                                          |
| <i>a</i> H <sub>S</sub> | 7.11 ± 0.07                  | 7.07                      | 0.04                                          |
| <i>b</i> H <sub>A</sub> | 7.62 ± 0.04                  | 7.62                      | 0.00                                          |
| <i>b</i> H <sub>S</sub> | 6.89 ± 0.04                  | 6.89                      | 0.00                                          |
| <i>c</i> H <sub>A</sub> | 7.53 ± 0.04                  | 7.33                      | 0.20 <sup>d</sup>                             |
| <i>c</i> H <sub>S</sub> | 7.01 ± 0.13                  | 6.98                      | 0.03                                          |
| <i>d</i> H <sub>A</sub> | 6.33 ± 0.11                  | 6.33                      | 0.00                                          |
| <i>d</i> H <sub>S</sub> | 6.45 ± 0.09                  | 6.67                      | -0.22                                         |
| <i>e</i> H <sub>A</sub> | 7.76 ± 0.01                  | 7.67                      | 0.09                                          |
| <i>e</i> H <sub>S</sub> | 7.03 ± 0.03                  | 6.98                      | 0.05                                          |
| <i>f</i> H              | 8.20 ± 0.05                  | 8.17                      | 0.03                                          |
| <i>g</i> H <sub>A</sub> | 7.92 ± 0.04                  | 7.91                      | 0.01                                          |
| <i>g</i> H <sub>S</sub> | 7.08 ± 0.05                  | 7.07                      | 0.01                                          |

<sup>a</sup>Cbl's = AdoCbl, CH<sub>3</sub>Cbl, CNCbl, CF<sub>3</sub>Cbl, CN-10-ClCbl, H<sub>2</sub>OCbl<sup>+</sup>, and H<sub>2</sub>O-10-ClCbl<sup>+</sup>, except for the *c* amide N-H's where H<sub>2</sub>OCbl<sup>+</sup>, and H<sub>2</sub>O-10-ClCbl<sup>+</sup> are omitted from the comparison.

<sup>b</sup>Average chemical shift shown is the average and standard deviation of the shifts of the Cbl's.

<sup>c</sup> $\Delta$   $\delta$  <sup>1</sup>H =  $\delta$  <sub>ave</sub> -  $\delta$  <sub>H<sub>2</sub>O-10-NOcbl<sup>+</sup></sub>.

<sup>d</sup>For H<sub>2</sub>OCbl<sup>+</sup>,  $\Delta$   $\delta$  <sup>1</sup>H was -0.63 for *c*H<sub>A</sub> and -0.15 for *c*H<sub>S</sub>.

**Table S4.** Primary kinetic data for the substitution of  $\Gamma$  in iodocobalamin by incoming L ( $\mu = 2.2 \text{ mol dm}^{-3}$ ,  $\text{NaClO}_4$ ; pH 7.00,  $0.1 \text{ mol dm}^{-3}$  MOPS).

| L                           | T /°C  | [L] /mol<br>dm <sup>-3</sup> | <i>k</i> <sub>obs</sub> | L                                           | T /°C  | [L] /mol<br>dm <sup>-3</sup> | <i>k</i> <sub>obs</sub> |
|-----------------------------|--------|------------------------------|-------------------------|---------------------------------------------|--------|------------------------------|-------------------------|
| Imidazole                   | 10.0   | 0.1003                       | 0.2105                  | N <sub>3</sub> <sup>-</sup>                 | 25.0   | 0.1001                       | 6.19                    |
|                             |        | 0.1983                       | 0.4743                  |                                             |        | 0.2006                       | 9.34                    |
|                             |        | 0.2942                       | 0.6764                  |                                             |        | 0.3065                       | 14.07                   |
|                             |        | 0.4003                       | 0.866                   |                                             |        | 0.4016                       | 16.45                   |
|                             |        | 0.5013                       | 0.9851                  |                                             |        | 0.6000                       | 22.00                   |
|                             | 15.0   | 0.1003                       | 0.3925                  |                                             | 0.7990 | 27.43                        |                         |
|                             |        | 0.1983                       | 0.8712                  |                                             | 0.9025 | 28.73                        |                         |
|                             |        | 0.2942                       | 1.2699                  |                                             | 0.9990 | 29.30                        |                         |
|                             |        | 0.4003                       | 1.595                   |                                             | 30.0   | 0.2006                       | 15.5                    |
|                             |        | 0.5013                       | 1.7605                  |                                             |        | 0.3065                       | 20.9                    |
|                             | 0.5483 | 1.7502                       | 0.4016                  |                                             |        | 26.7                         |                         |
|                             | 20.0   | 0.1003                       | 0.6847                  |                                             | 0.5002 | 30.6                         |                         |
|                             |        | 0.1983                       | 1.4710                  |                                             | 0.6997 | 37.6                         |                         |
|                             |        | 0.2942                       | 2.2512                  |                                             | 0.7990 | 43.9                         |                         |
|                             |        | 0.4003                       | 2.7778                  | 0.9025                                      | 46.2   |                              |                         |
|                             |        | 0.5013                       | 3.1466                  | S <sub>2</sub> O <sub>3</sub> <sup>2-</sup> | 10.0   | 0.0959                       | 0.1582                  |
|                             | 0.5483 | 3.1918                       | 0.1003                  |                                             |        | 0.1660                       |                         |
|                             | 0.6074 | 3.2436                       | 0.2010                  |                                             | 0.3385 |                              |                         |
|                             | 0.1003 | 0.6847                       | 0.2512                  |                                             | 0.4083 |                              |                         |
|                             | 0.1983 | 1.4710                       | 0.2993                  |                                             | 0.4752 |                              |                         |
|                             | 25.0   | 0.2942                       | 2.2512                  |                                             | 0.3498 | 0.6003                       |                         |
|                             |        | 0.1003                       | 1.2876                  |                                             | 15.0   | 0.0959                       | 0.2710                  |
|                             |        | 0.1983                       | 2.7327                  |                                             |        | 0.1003                       | 0.2970                  |
|                             |        | 0.2942                       | 4.0041                  |                                             | 0.2010 | 0.5370                       |                         |
|                             |        | 0.4003                       | 4.8923                  |                                             | 0.2512 | 0.6317                       |                         |
|                             |        | 0.5013                       | 5.5882                  |                                             | 0.2993 | 0.8586                       |                         |
|                             |        | 0.5483                       | 5.7308                  |                                             | 0.3498 | 0.9599                       |                         |
|                             |        | 0.6074                       | 5.9727                  |                                             | 20.0   | 0.0959                       | 0.4718                  |
| 0.6533                      |        | 6.0930                       | 0.1003                  |                                             |        | 0.4925                       |                         |
| 0.6989                      |        | 6.2171                       | 0.2010                  | 0.9148                                      |        |                              |                         |
| 0.7926                      | 6.3424 | 0.2512                       | 1.1370                  |                                             |        |                              |                         |
| N <sub>3</sub> <sup>-</sup> | 10.0   | 0.9017                       | 6.2580                  | 0.2993                                      | 1.3400 |                              |                         |
|                             |        | 0.2006                       | 2.058                   | 0.3498                                      | 1.6340 |                              |                         |
|                             |        | 0.3065                       | 3.002                   | 25.0                                        | 0.0959 | 0.7623                       |                         |
|                             |        | 0.4016                       | 3.717                   |                                             | 0.1003 | 0.7931                       |                         |
|                             |        | 0.5002                       | 4.198                   |                                             | 0.2010 | 1.3420                       |                         |
|                             | 0.6997 | 4.989                        | 0.2512                  |                                             | 1.8690 |                              |                         |
|                             | 0.7990 | 5.435                        | 0.2993                  |                                             | 2.2300 |                              |                         |

| L                           | T /°C | [L] /mol<br>dm <sup>-3</sup> | <i>k</i> <sub>obs</sub> | L                                           | T /°C | [L] /mol<br>dm <sup>-3</sup> | <i>k</i> <sub>obs</sub> |
|-----------------------------|-------|------------------------------|-------------------------|---------------------------------------------|-------|------------------------------|-------------------------|
| N <sub>3</sub> <sup>-</sup> | 15.0  | 0.1001                       | 2.293                   | S <sub>2</sub> O <sub>3</sub> <sup>2-</sup> | 25.0  | 0.3498                       | 2.3870                  |
|                             |       | 0.2006                       | 3.521                   |                                             |       |                              |                         |
|                             |       | 0.3065                       | 4.713                   |                                             |       |                              |                         |
|                             |       | 0.4016                       | 5.974                   |                                             |       |                              |                         |
|                             |       | 0.7990                       | 9.933                   |                                             |       |                              |                         |
|                             |       | 0.9025                       | 10.42                   |                                             |       |                              |                         |
